# Supplementary material
Source: Springer Nature journal article supplement (https://www.springermedizin.de/resource/supplementary/12967_2012_1558_MOESM3_ESM.pdf/9574322)

**A** LDA analysis, all subjects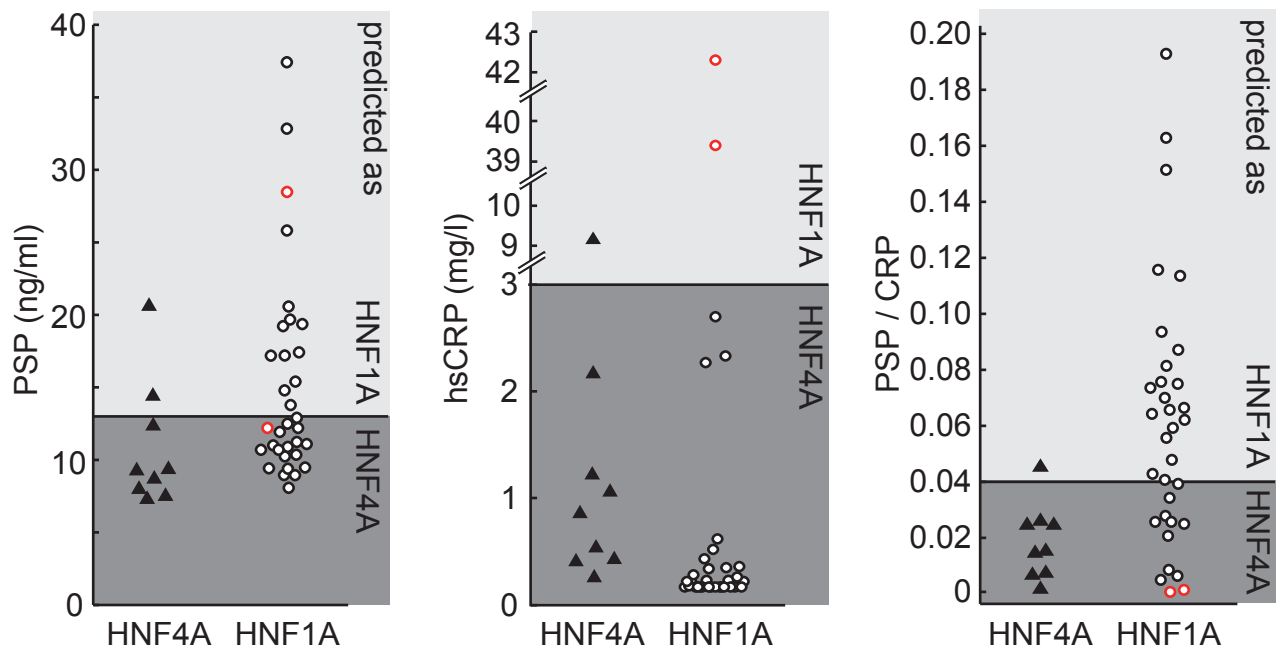**B** LDA analysis, excluding subjects with extreme hsCRP levels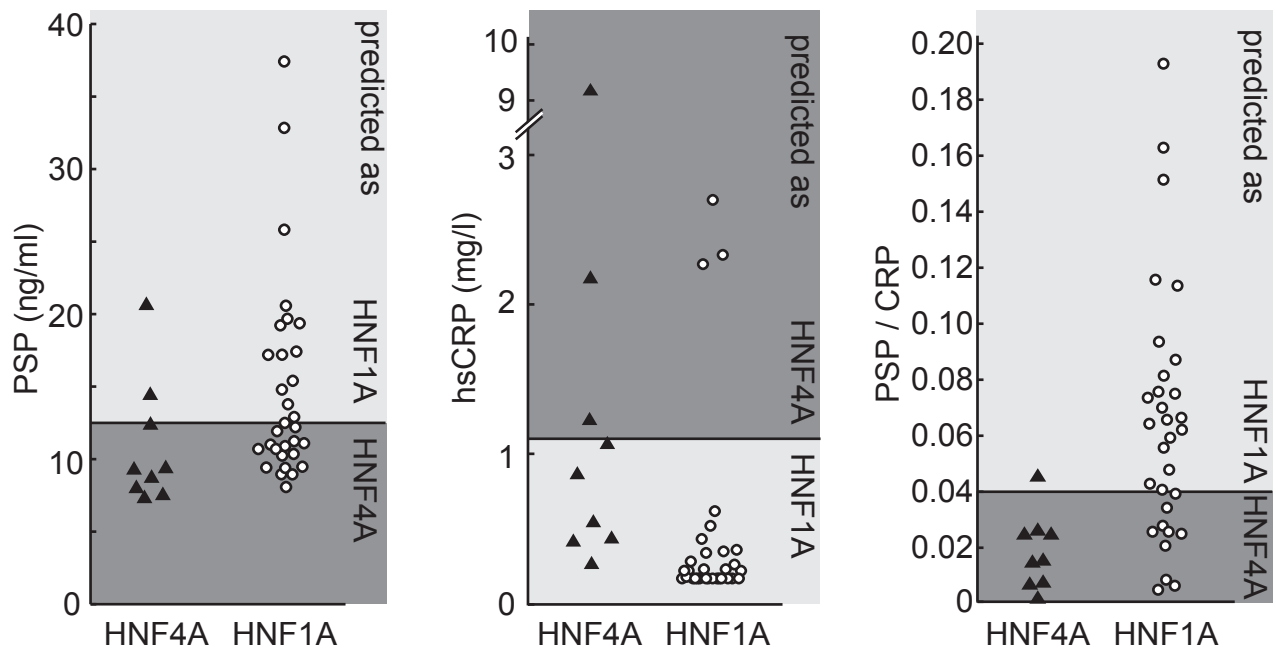

Supplement: MOESM3 [file 9574322]
